# Supplementary material
Source: PubMed Central journal article supplement (PMC2697052)

denotes a statistically significant difference,  $p < 0.05$ . (C) Quantitative RT-PCR analysis of *cyclin E* (top) and *cyclin A* (bottom) mRNA levels from  $Rb^{c-/c-}$  and control littermates. mRNA was isolated from the calvaria of e16.5 embryos. Analysis performed as described in Figure 3.  $Rb^{c-/c-}$  calvaria (blue bars) express increased levels of *cyclin A* and *cyclin E* relative to wild-type littermates (red bars). Error bars signify one standard deviation. Abbreviations: br, brain; de, dermis; fr, frontal bone. WT =  $Rb^{+/c};Mox2^{+/+}$ , Rb =  $Rb^{c-/c-};Mox2^{+/Cre}$ .

**Figure 6. Deletion of *E2f1* suppresses the bone defects due to the loss of pRb.** (A)

Immunohistochemical analysis of BrdU incorporation (top) or PCNA protein expression (bottom) in coronal sections of frontal bones from e17.5 embryos, performed with 4 to 6 samples of each genotype. Deletion of *E2f1* suppresses the increased BrdU incorporation and PCNA expression observed in  $Rb^{c-/c-}$  frontal bone osteoblasts. (B) Skeletal staining of e17.5 embryos as described in Figure 1. Deletion of *E2f1* suppresses the decreased ossification found in the  $Rb^{c-/c-}$  calvaria (first column) and hyoid bone (second column). Deletion of *E2f1* also suppresses the aberrant formation of the palatine process and pterygoid bone (third column) and xiphoid process (fourth column) observed in  $Rb^{c-/c-}$  skeletons. An aberrant palatine process in the  $Rb^{c-/c-}$  and a suppressed palatine process in the double mutant are circled in the respective third column figures. Error bars signify one standard deviation. \* denotes a statistically significant difference between  $Rb^{c-/c-}$  and wild-type,  $E2f1^{-/-}$ , or  $Rb^{c-/c-};E2f1^{-/-}$ ,  $p < 0.05$ . WT =  $Rb^{+/c};Mox2^{+/+};E2f1^{+/+}$ ,  $E2f1 = Rb^{+/c};Mox2^{+/+};E2f1^{-/-}$ , Rb =  $Rb^{c-/c-};Mox2^{+/Cre};E2f1^{+/+}$ , RbE2f1 =  $Rb^{c-/c-};Mox2^{+/Cre};E2f1^{-/-}$ .

**Supplemental Figure 1. Deletion of *Rb* *in vivo* does not affect osteoclast activity.** TRAP

analysis of coronal sections from wild-type and  $Rb^{c-/c-}$  frontal bones of e17.5 embryos. Neither wild-type nor  $Rb^{c-/c-}$  frontal bones exhibit osteoclasts as assessed by TRAP staining. A positively

stained osteoclast (arrow) within a facial bone from the same section as the wild-type frontal bone is shown (“+ Ctrl” and “+ Ctrl 40X”). 20X magnification shown except for “+ Ctrl 40X,” which is 40X magnification. Frontal bones are marked with the bar. Abbreviations: S, suture. WT =  $Rb^{+/c};Mox2^{+/+}$ , Rb =  $Rb^{c-/c-};Mox2^{+/Cre}$ .

**Supplemental Figure 2.  $Rb^{c-/c-}$  calvaria display increased mRNA levels of  $E2f1$ .**

Quantitative RT-PCR analysis of  $Rb$  (left) and  $E2f1$  (right) mRNA levels from  $Rb^{c-/c-}$  and control littermates. mRNA was isolated from the calvaria of e16.5 embryos. Analysis performed as described in Figure 3. (Left)  $Rb$  mRNA is expressed in the calvaria of  $E2f1^{-/-}$ ,  $Rb$  heterozygous, and wild-type embryos. (Right)  $Rb^{c-/c-}$  calvaria express increased levels of  $E2f1$  relative to control littermates. Error bars signify one standard deviation. WT =  $Rb^{+/c};Mox2^{+/+};E2f1^{+/+}$ ,  $E2f1 = Rb^{+/c};Mox2^{+/+};E2f1^{-/-}$ , Rb =  $Rb^{c-/c-};Mox2^{+/Cre};E2f1^{+/+}$ .

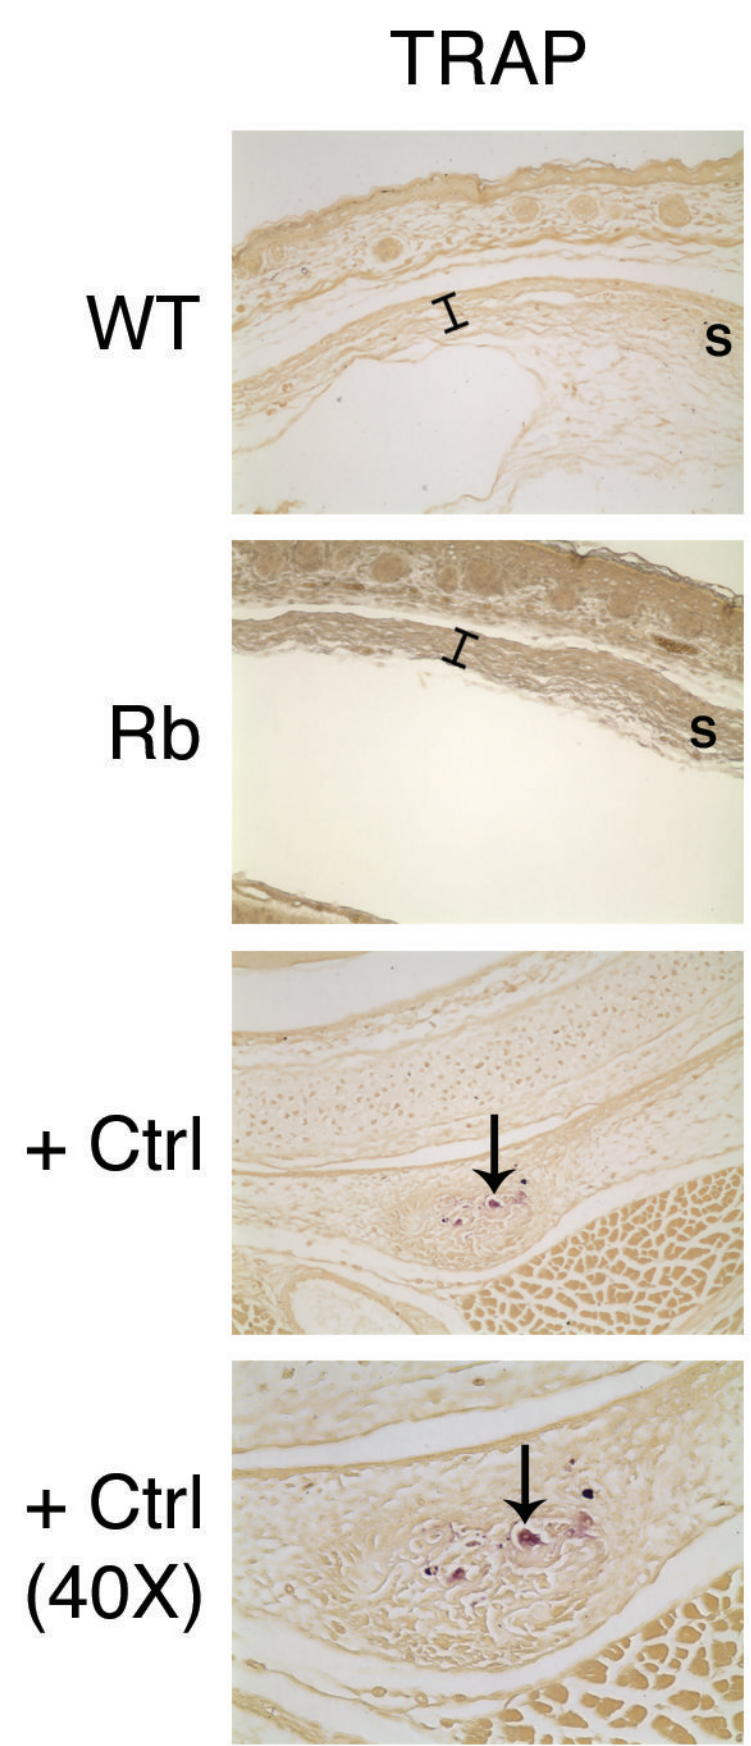

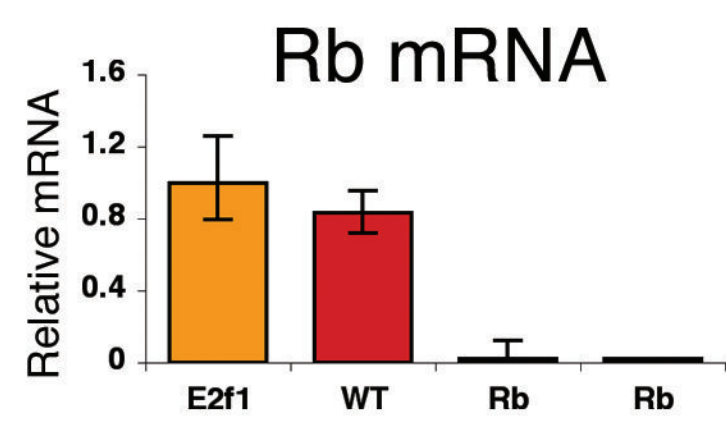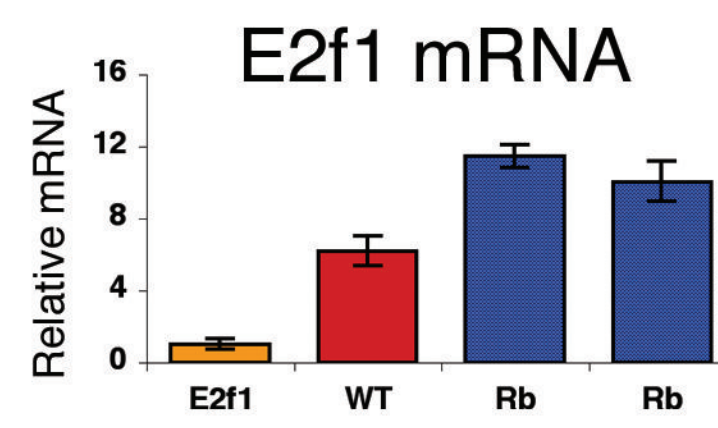

Supplement: NIHMS101901-supplement-supplement_1.pdf [file NIHMS101901-supplement-supplement_1.pdf]
